# Supplementary material for: Rv2577 of Mycobacterium tuberculosis Is a Virulence Factor With Dual Phosphatase and Phosphodiesterase Functions
Source: Front Microbiol. 2020 Oct 22;11:570794. doi: 10.3389/fmicb.2020.570794 (PMC7642983; doi:10.3389/fmicb.2020.570794)
Supplement: Supplementary Table 2 — Strains, plasmids and primers used in this study. [file Table_2.DOCX]

**Supplementary Table 2. Strains, plasmids and primers used in this study.**

| Strains | Relevant description | Reference |
| --- | --- | --- |
| *M. tuberculosis* wild type | *M. tuberculosis* CDC 1551 | NR-13649. BEI Resources |
| *M. tuberculosis* Rv2577 mutant | *M. tuberculosis* CDC 1551 Rv2577::KmR | NR-18473. BEI Resources |
| *M. tuberculosis* complemented | *M. tuberculosis* CDC 1551 Rv2577::KmR (pVV16::Rv2577) | This study |
| *M. smegmatis* | *M. smegmatis* strain ATCC 700084 mc2155 | ATCC |
| Plasmids |  |  |
| pVV16 | Mycobacterial replicative vector. KmR HygR | NR-13402. BEI Resources |
| pVV16::Rv2577 | pVV16 vector carrying the Rv2577 gene in a *Nde*I restriction site. | This study |
| pML2031 | Mycobacterial replicative and expression vector. HygR | Dr. Niederweis |
| pML2031::Rv2577wt | pML2031 carrying the Rv2577 gene into a *Nde*I/*EcoR*V restriction site. HygR | This study |
| pML2031::Rv2577 D173A | pML2031::Rv2577 within a D173A mutation | This study |
| pML2031::Rv2577 D217A | pML2031::Rv2577 within a D217A mutation | This study |
| pML2031::Rv2577 Y220A | pML2031::Rv2577 within a Y220A mutation | This study |
| pML2031::Rv2577 N253A | pML2031::Rv2577 within a N253A mutation | This study |
| pML2031::Rv2577 H348A | pML2031::Rv2577 within a H348A mutation | This study |
| pML2031::Rv2577 H385A | pML2031::Rv2577 within a H385A mutation | This study |
| pML2031::Rv2577 H387A | pML2031::Rv2577 within a H387A mutation | This study |
| Primers |  |  |
| Rv2577wt |  | This study |
| FwRv2577Ms | 5´CATATGGGCGCCGATCTGAAGC3´ |  |
| RevRv2577Ms | 5´GATATCTCCGCCGCGCGGCTT3´ |  |
| Rv2577 D173A mutant |  | This study |
| D173A sense | 5´CACCAGCTTCGGTGCTCAGTCCACTCCCGCG3´ |  |
| D173A antisense | 5´CGCGGGAGTGGACTGAGCACCGAAGCTGGTG3´ |  |
| Rv2577 D217A mutant |  | This study |
| D217A sense | 5´CTGATCAACGGTGCCCTGTGTTACGCCAAC3´ |  |
| D217A antisense | 5´GTTGGCGTAACACAGGGCACCGTTGATCAG3´ |  |
| Rv2577 Y220A mutant |  | This study |
| Y220A sense | 5´CGGTGACCTGTGTGCCGCCAACCTGGCAC3´ |  |
| Y220A antisense | 5´GTGCCAGGTTGGCGGCACACAGGTCACCG3´ |  |
| Rv2577 N253A mutant |  | This study |
| N253A sense | 5´GCCGGCAGCGGGCGCTCACGAGAACGAAGTC3´ |  |
| N253A antisense | 5´GACTTCGTTCTCGTGAGCGCCCGCTGCCGGC3´ |  |
| Rv2577 H348A mutant |  | This study |
| H348A sense | 5´GGTCGTCTGCATGGCTCAGACCGCGATCTCC3´ |  |
| H348A antisense | 5´GGAGATCGCGGTCTGAGCCATGCAGACGACC3´ |  |
| Rv2577 H385A mutant |  | This study |
| H385A sense | 5´GGTGGTGTGCGGCGCCGAACACCACTACGAG3´ |  |
| D385A antisense | 5´CTCGTAGTGGTGTTCGGCGCCGCACACCACC3´ |  |
| Rv2577 H387A mutant |  | This study |
| H387A sense | 5´GGTGGTGTGCGGCGCCGAACACCACTACGAG3´ |  |
| D387A antisense | 5´CTCGTAGTGGTGTTCGGCGCCGCACACCACC3´ |  |

The *Nde*I (CATATG) and *EcoR*V (GATATC) restriction sites and the codon, which codified for each amino acid residues in the catalytic site of Rv2577 mutated by alanine, are underline.
